# Supplementary material for: Biomimetic Catalysts Based on Au@TiO2-MoS2-CeO2 Composites for the Production of Hydrogen by Water Splitting
Source: Preprints.org preprint supplement (doi:10.20944/preprints202211.0535.v1), 2022-11-29
Supplement: Supplementary file 1 [file Supplementary Information.docx]

Supplementary Information

Biomimetic Catalysts Based on Au@TiO2-MoS2-CeO2 Composites for the Production of Hydrogen by Water Splitting

Kenneth Fontánez1, Diego García2, Dayna Ortiz3, Paola Sampayo3, Luis Hernández3, María Cotto3, José Ducongé3, Francisco Díaz3, Carmen Morant4, Florian Petrescu3, Abniel Machín5*, and Francisco Márquez3*

1 Department of Chemistry, University of Puerto Rico, Rio Piedras Campus, San Juan, 00925PR, United States

2 Department of Biochemistry, School of Medicine, University of Puerto Rico, Medical Sciences Campus, San Juan, 00936PR, United States

3 Nanomaterials Research Group, Department of Natural Sciences and Technology, Division of Natural Sciences, Technology and Environment, Universidad Ana G. Méndez-Gurabo Campus, 00778PR, United States

4 Department of Applied Physics, Autonomous University of Madrid, and Instituto de Ciencia de Materiales Nicolás Cabrera, 28049, Madrid, Spain

5 Department of Natural Sciences and Technology, Division of Natural Sciences, Technology and Environment, Universidad Ana G. Méndez-Cupey Campus, 00926PR, United States

***** Correspondence: [fmarquez@uagm.edu](mailto:fmarquez@uagm.edu) (FM), [machina1@uagm.edu](mailto:machina1@uagm.edu) (AM)

**Figure S1**. HR-SEM micrograph of a MoS2 particle in an intermediate stage of exfoliation, and before being dispersed.

**Figure S2**. Evaluation of the initial concentration of the catalyst (5%Au@TiO2NWs-5%MoS2-5%CeO2NPs) (a) and of the pH (b) on the H2 production; and control experiments for 3%Au@TiO2NWs-5%MoS2-5%CeO2NPs (c).


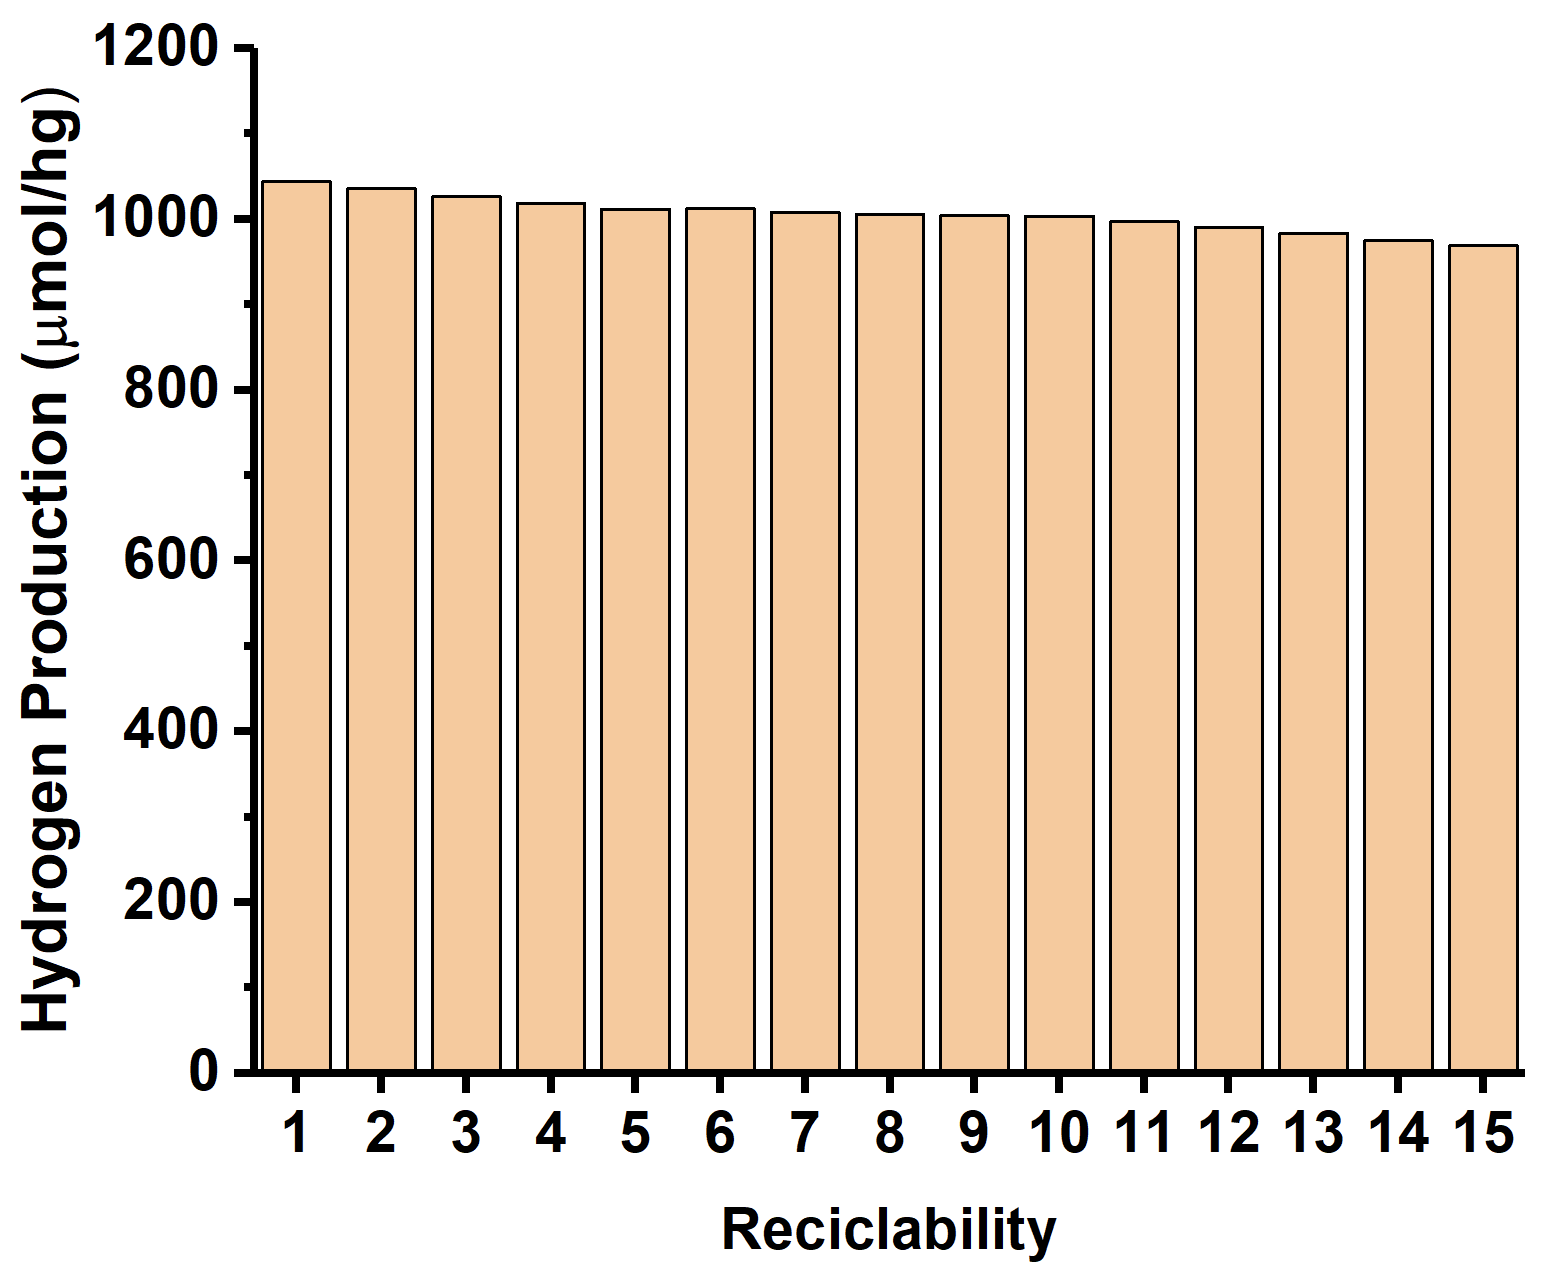


**Figure S3**. Recyclability of 5%Au@TiO2NWs-5%MoS2-5%CeO2NPs after 15 consecutive catalytic HER cycles under UV-visible radiation.

**Figure S4**. Photocatalytic activity of the most representative types of catalysts in the presence of hole scavengers (methanol and EDTA-Na2) under UV-vis radiation.

**Table S1.** BET surface area of the as-synthesized materials.

| **Material** | **BET area (m2/g)** | |
| --- | --- | --- |
| TiO2NWs | | 236 |
| 1%Au@TiO2NWs  3%Au@TiO2NWs  5%Au@TiO2NWs  MoS2  CeO2NPs  1%Au@TiO2NWs-1%MoS2-5%CeO2NPs  3%Au@TiO2NWs-1%MoS2-5%CeO2NPs  5%Au@TiO2NWs-1%MoS2-5%CeO2NPs  1%Au@TiO2NWs-3%MoS2-5%CeO2NPs  3%Au@TiO2NWs-3%MoS2-5%CeO2NPs  5%Au@TiO2NWs-3%MoS2-5%CeO2NPs  1%Au@TiO2NWs-5%MoS2-1%CeO2NPs  3%Au@TiO2NWs-5%MoS2-1%CeO2NPs  5%Au@TiO2NWs-5%MoS2-1%CeO2NPs  1%Au@TiO2NWs-5%MoS2-3%CeO2NPs  3%Au@TiO2NWs-5%MoS2-3%CeO2NPs  5%Au@TiO2NWs-5%MoS2-3%CeO2NPs  1%Au@TiO2NWs-5%MoS2-5%CeO2NPs  3%Au@TiO2NWs-5%MoS2-5%CeO2NPs  5%Au@TiO2NWs-5%MoS2-5%CeO2NPs | | 242  263  275  183  241  311  327  252  301  322  329  289  295  307  248  261  272  332  347  396 |

**Table S2.** Maximum H2 production (µmol/hg) by the synthesized catalysts at different wavelengths

| **Catalyst** | **Irradiation Wavelength (nm)** | | | | | | | |
| --- | --- | --- | --- | --- | --- | --- | --- | --- |
| **220** | **280** | **320** | **400** | **500** | **600** | **700** |
| 1%Au@TiO2NWs-1%MoS2-5%CeO2NPs | 577 | 618 | 675 | 684 | 603 | 463 | 342 | |
| 3%Au@TiO2NWs-1%MoS2-5%CeO2NPs | 669 | 788 | 876 | 980 | 708 | 565 | 397 | |
| 5%Au@TiO2NWs-1%MoS2-5%CeO2NPs | 762 | 869 | 924 | 993 | 773 | 571 | 416 | |
| 1%Au@TiO2NWs-3%MoS2-5%CeO2NPs | 637 | 678 | 741 | 744 | 661 | 493 | 398 | |
| 3%Au@TiO2NWs-3%MoS2-5%CeO2NPs | 818 | 922 | 984 | 1019 | 826 | 639 | 480 | |
| 5%Au@TiO2NWs-3%MoS2-5%CeO2NPs | 814 | 907 | 949 | 971 | 803 | 661 | 521 | |
| 1%Au@TiO2NWs-5%MoS2-1%CeO2NPs | 537 | 556 | 573 | 606 | 555 | 380 | 298 | |
| 3%Au@TiO2NWs-5%MoS2-1%CeO2NPs | 845 | 811 | 821 | 819 | 668 | 462 | 323 | |
| 5%Au@TiO2NWs-5%MoS2-1%CeO2NPs | 849 | 837 | 865 | 863 | 707 | 511 | 341 | |
| 1%Au@TiO2NWs-5%MoS2-3%CeO2NPs | 625 | 644 | 653 | 675 | 599 | 424 | 325 | |
| 3%Au@TiO2NWs-5%MoS2-3%CeO2NPs | 897 | 861 | 876 | 905 | 733 | 583 | 381 | |
| 5%Au@TiO2NWs-5%MoS2-3%CeO2NPs | 924 | 920 | 915 | 932 | 741 | 594 | 420 | |
| 1%Au@TiO2NWs-5%MoS2-5%CeO2NPs | 726 | 708 | 854 | 889 | 749 | 536 | 402 | |
| 3%Au@TiO2NWs-5%MoS2-5%CeO2NPs | 815 | 861 | 1045 | 1114 | 848 | 645 | 427 | |
| 5%Au@TiO2NWs-5%MoS2-5%CeO2NPs | 656 | 803 | 934 | 1044 | 801 | 542 | 369 | |
|  |  |  |  |  |  |  |  | |
